# Supplementary material
Source: publisher figshare collection journal article supplement (https://frontiersin.figshare.com/ndownloader/files/24317111)
Supplement: Supplementary file [file 24317111]

## Supplementary Figure

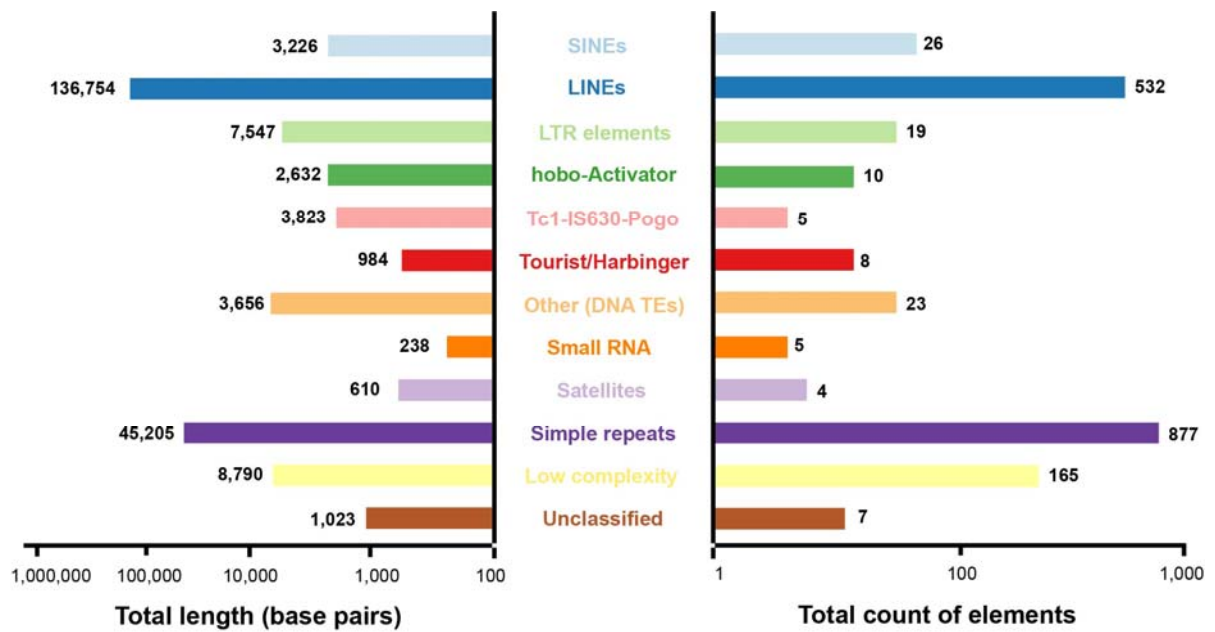

FIGURE S1 | (Singchat et al.)

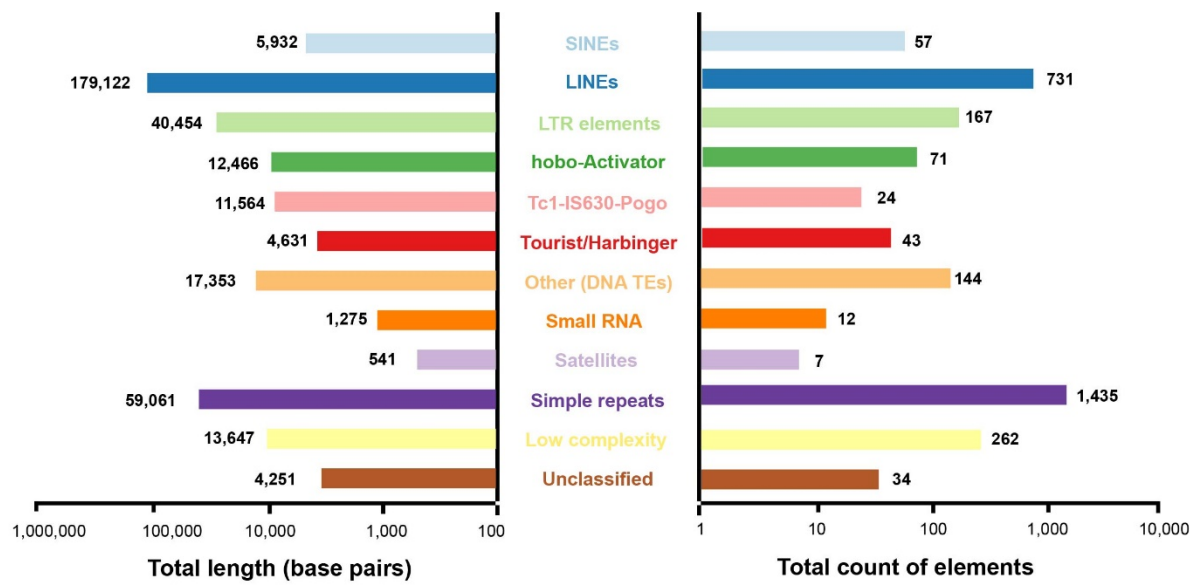

FIGURE S2 | (Singchat et al.)

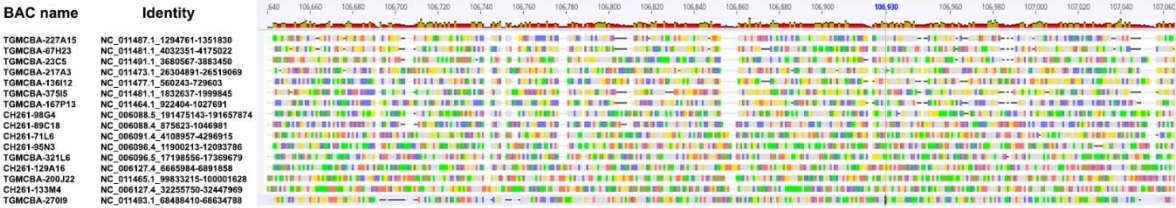

FIGURE S3 | (Singchat et al.)
